# Supplementary material for: Ebola virus requires a host scramblase for externalization of phosphatidylserine on the surface of viral particles
Source: PLOS journal article supplement (doi:10.1371/journal.ppat.1006848), 2018-01-16
Supplement: S3 (10.1371/journal.ppat.1006848.s003) [file journal.ppat.1006848.s003.pdf]

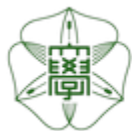

|                        |                                                                                                                                                 |
|------------------------|-------------------------------------------------------------------------------------------------------------------------------------------------|
| Title                  | Ebola virus requires a host scramblase for externalization of phosphatidylserine on the surface of viral particles                              |
| Author(s)              | Nanbo, Asuka; Maruyama, Junki; Imai, Masaki; Ujie, Michiko; Fujioka, Yoichiro; Nishide, Shinya; Takada, Ayato; Ohba, Yusuke; Kawaoka, Yoshihiro |
| Citation               | PLOS pathogens, 14(1), e1006848<br><a href="https://doi.org/10.1371/journal.ppat.1006848">https://doi.org/10.1371/journal.ppat.1006848</a>      |
| Issue Date             | 2018-01                                                                                                                                         |
| Doc URL                | <a href="http://hdl.handle.net/2115/68604">http://hdl.handle.net/2115/68604</a>                                                                 |
| Rights(URL)            | <a href="http://creativecommons.org/licenses/by/4.0/">http://creativecommons.org/licenses/by/4.0/</a>                                           |
| Type                   | article                                                                                                                                         |
| Additional Information | There are other files related to this item in HUSCAP. Check the above URL.                                                                      |
| File Information       | journal.ppat.1006848.s003.pdf (S3 Fig.)                                                                                                         |

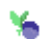

[Instructions for use](#)

HEK293T

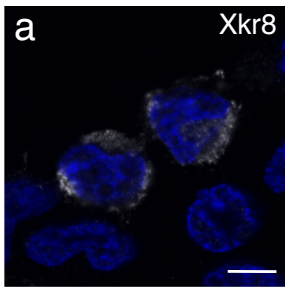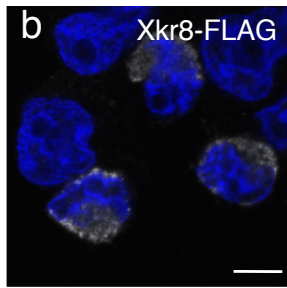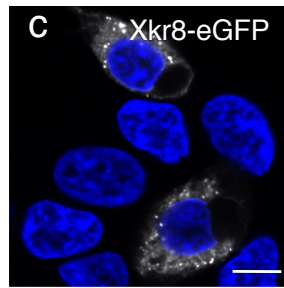

NU-GC-3

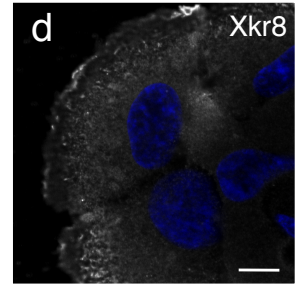

Scale bars: 10  $\mu$ m
